# Supplementary material for: Biodegradability of unheated and laboratory heated dissolved organic matter
Source: Royal Society of Chemistry journal article supplement (doi:10.1039/d3em00383c), 2024-01-01
Supplement: d3em00383c1.pdf [file d3em00383c1.pdf]

1

## Supplementary Information

2

### Biodegradability of Unheated and Laboratory Heated Dissolved Organic Matter

3

Saraf Islam Promi<sup>1,3</sup>, Courtney M. Gardner<sup>1,3</sup>, and Amanda K. Hohner<sup>1,2\*</sup>

4

1. Department of Civil and Environmental Engineering, Washington State University,  
Pullman, WA

5

6

2. Department of Civil Engineering, Montana State University, Bozeman, MT

7

3. Maseeh Department of Civil, Architectural and Environmental Engineering, University  
of Texas at Austin, TX

8

9

10

\*Corresponding Author: amanda.hohner@montana.edu

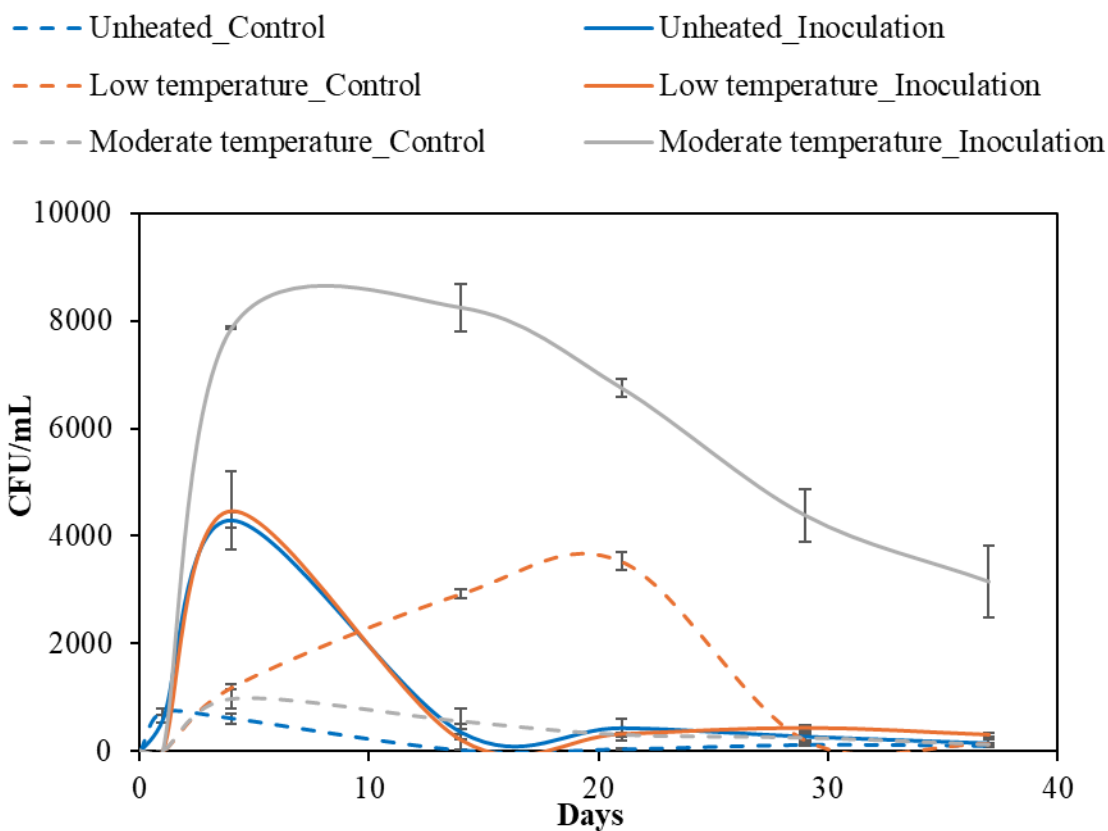

**Figure S1.** Changes in microbial concentration (CFU/mL) with incubation time.

11

12

13

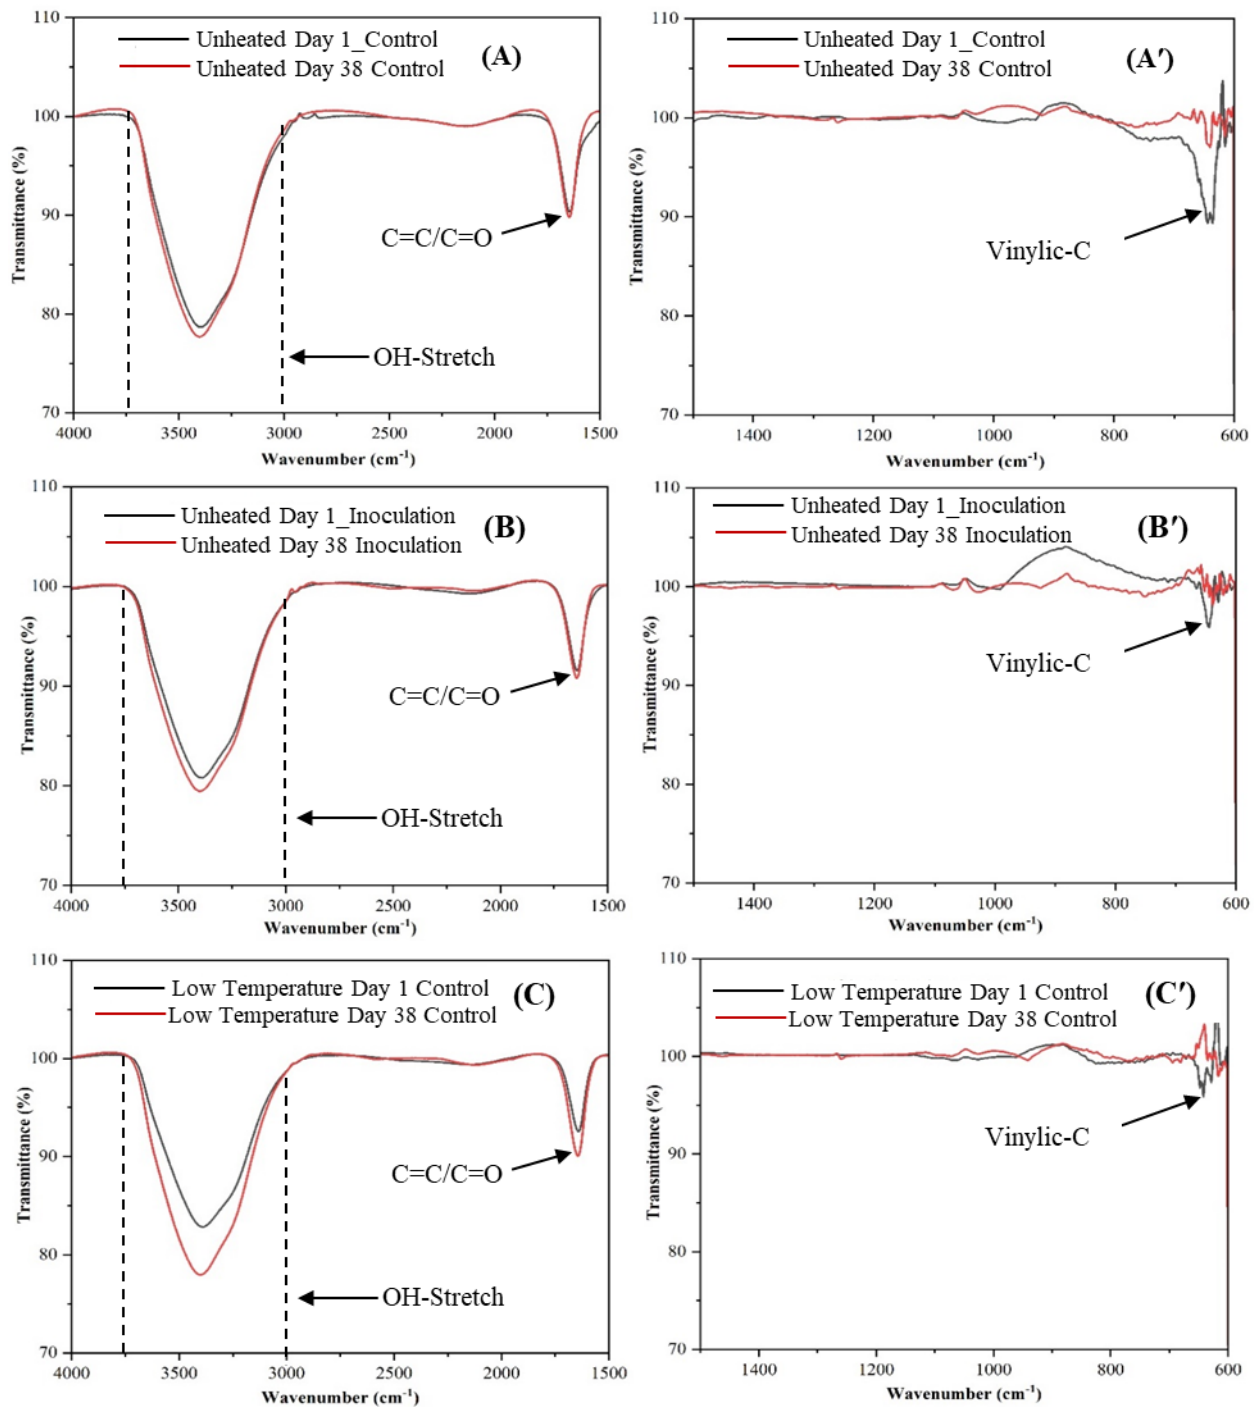

**Figure S2.** FTIR spectra of functional group (4000-1500 cm<sup>-1</sup>) region for (A) Unheated Control (B) Unheated Inoculation (C) Low Temperature Control (D) Low Temperature Inoculation (E) Moderate Temperature Control (f) Moderate Temperature Inoculation. Fingerprint regions (1500-600 cm<sup>-1</sup>) for all the samples are shown in the 'prime' denoted figures (A',B',C', D', E', F') at Day 1 (black line) and Day 38 (red line) of the incubation period.

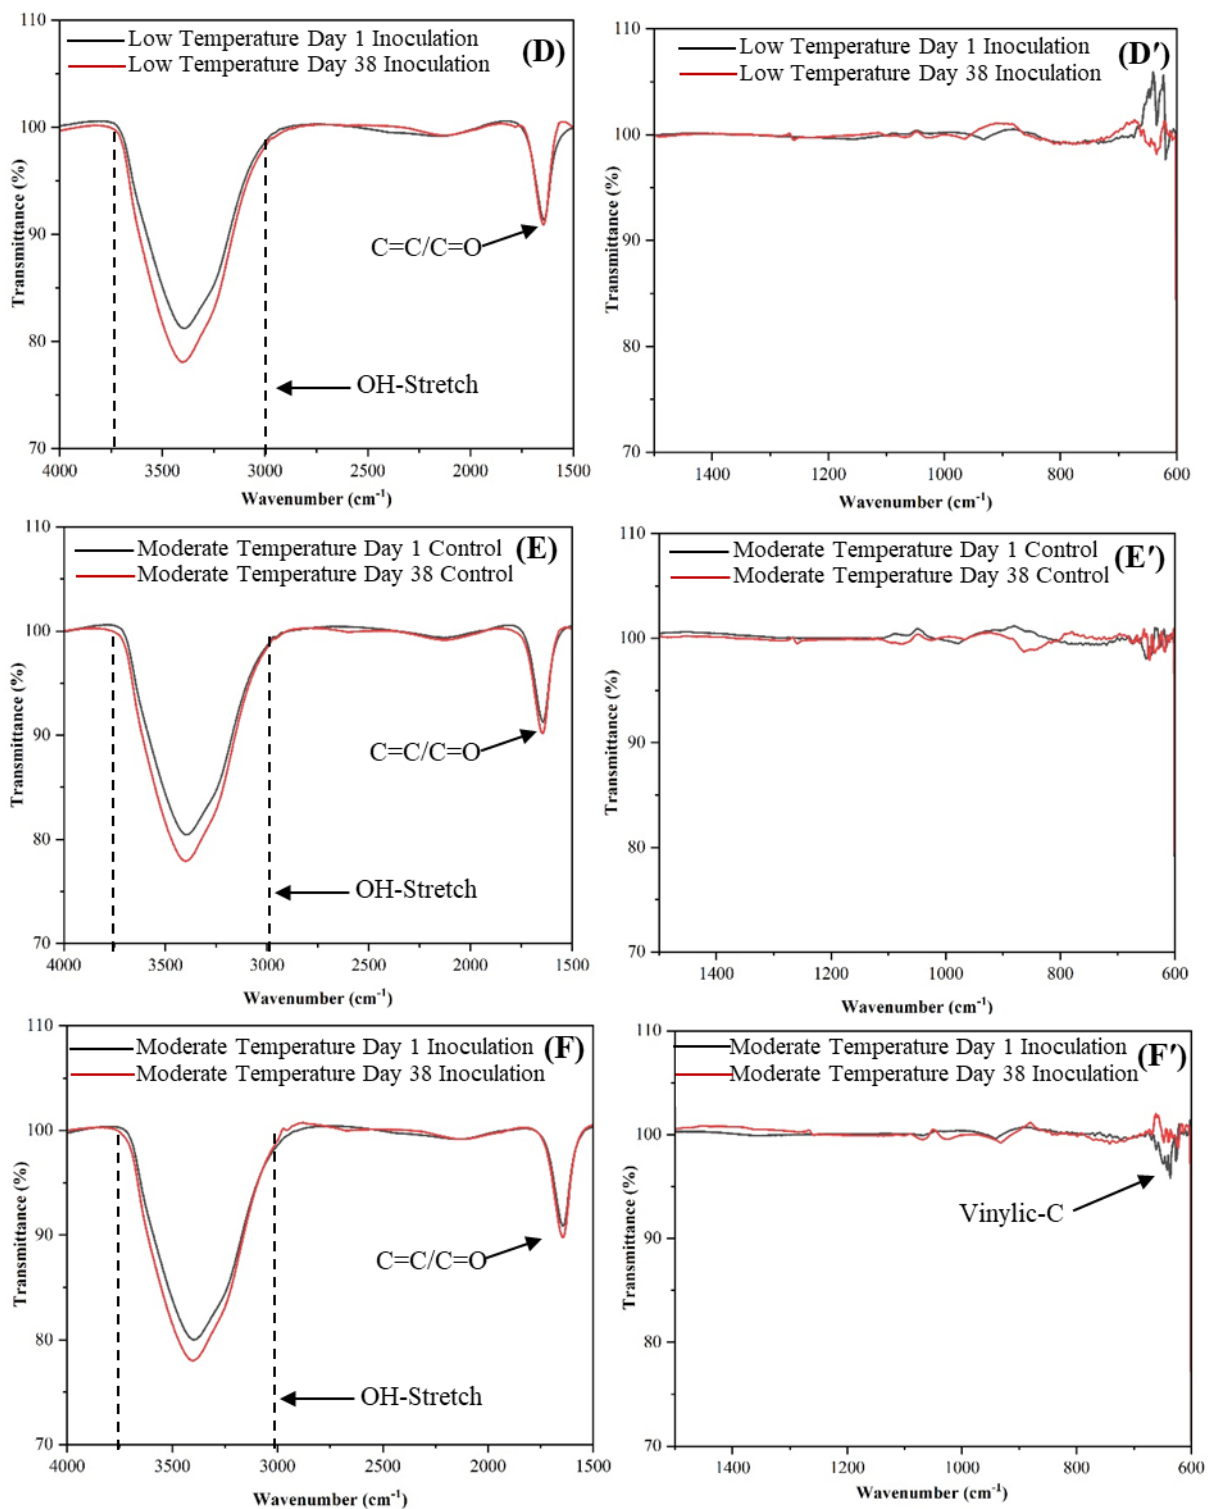

**Figure S2 (Cont.).** FTIR spectra of functional group ( $4000\text{-}1500\text{ cm}^{-1}$ ) region for (A) Unheated Control (B) Unheated Inoculation (C) Low Temperature Control (D) Low Temperature Inoculation (E) Moderate Temperature Control (F) Moderate Temperature Inoculation. Fingerprint regions ( $1500\text{-}600\text{ cm}^{-1}$ ) for all the samples are shown in the 'prime' denoted figures (A',B',C', D', E', F') at Day 1 (black line) and Day 38 (red line) of the incubation period.

## 16 Changes in Different Nitrogen Species

17 DON biodegradation influenced nitrogen speciation during incubation experiments (Figure  
18 S3). For all samples, with the decrease of organic nitrogen, ammonia-N increased as microbes  
19 converted organic nitrogen to ammonia/ammonium through ammonification. Nitrite and nitrate  
20 ( $\text{NO}_2^- + \text{NO}_3^-$ ) concentrations also increased with time. After four days of incubation,  $\text{NO}_2^- + \text{NO}_3^-$   
21 started to increase for all samples in the control experiment and for low and moderate temperature  
22 samples in the inoculation experiment. For control unheated samples, the  $\text{NO}_2^- + \text{NO}_3^-$  increase  
23 started on day 8 (Figure S3). It is possible that a portion of ammonia/ammonium was converted to  
24  $\text{NO}_2^- + \text{NO}_3^-$  following nitrification as nitrifying bacteria are common in microbial communities,  
25 and under aerobic conditions first transform free ammonium into nitrite and then into nitrate.<sup>1,2</sup>  
26 However, for low and moderate temperature samples in the control experiment,  $\text{NO}_2^- + \text{NO}_3^-$   
27 concentration decreased on day 21 and day 8, respectively (Figure S3). The reactors for these  
28 samples may have become anaerobic and  $\text{N}_2$  or  $\text{N}_2\text{O}$  gas was being produced from  $\text{NO}_2^- + \text{NO}_3^-$   
29 through denitrification as under anaerobic conditions denitrifying bacteria transform  $\text{NO}_3^-$  into  
30  $\text{N}_2/\text{N}_2\text{O}$  gas.<sup>1,3</sup> However, the  $\text{N}_2/\text{N}_2\text{O}$  gas concentration was not measured in this study, and the  
31 occurrence of denitrification could not be confirmed. Lastly, the increase in the DON concentration  
32 for several samples on day 21 of the incubation may be due to the death of some microorganisms  
33 as dead microbial cells are a major source of DON.<sup>3</sup>

34

35

36

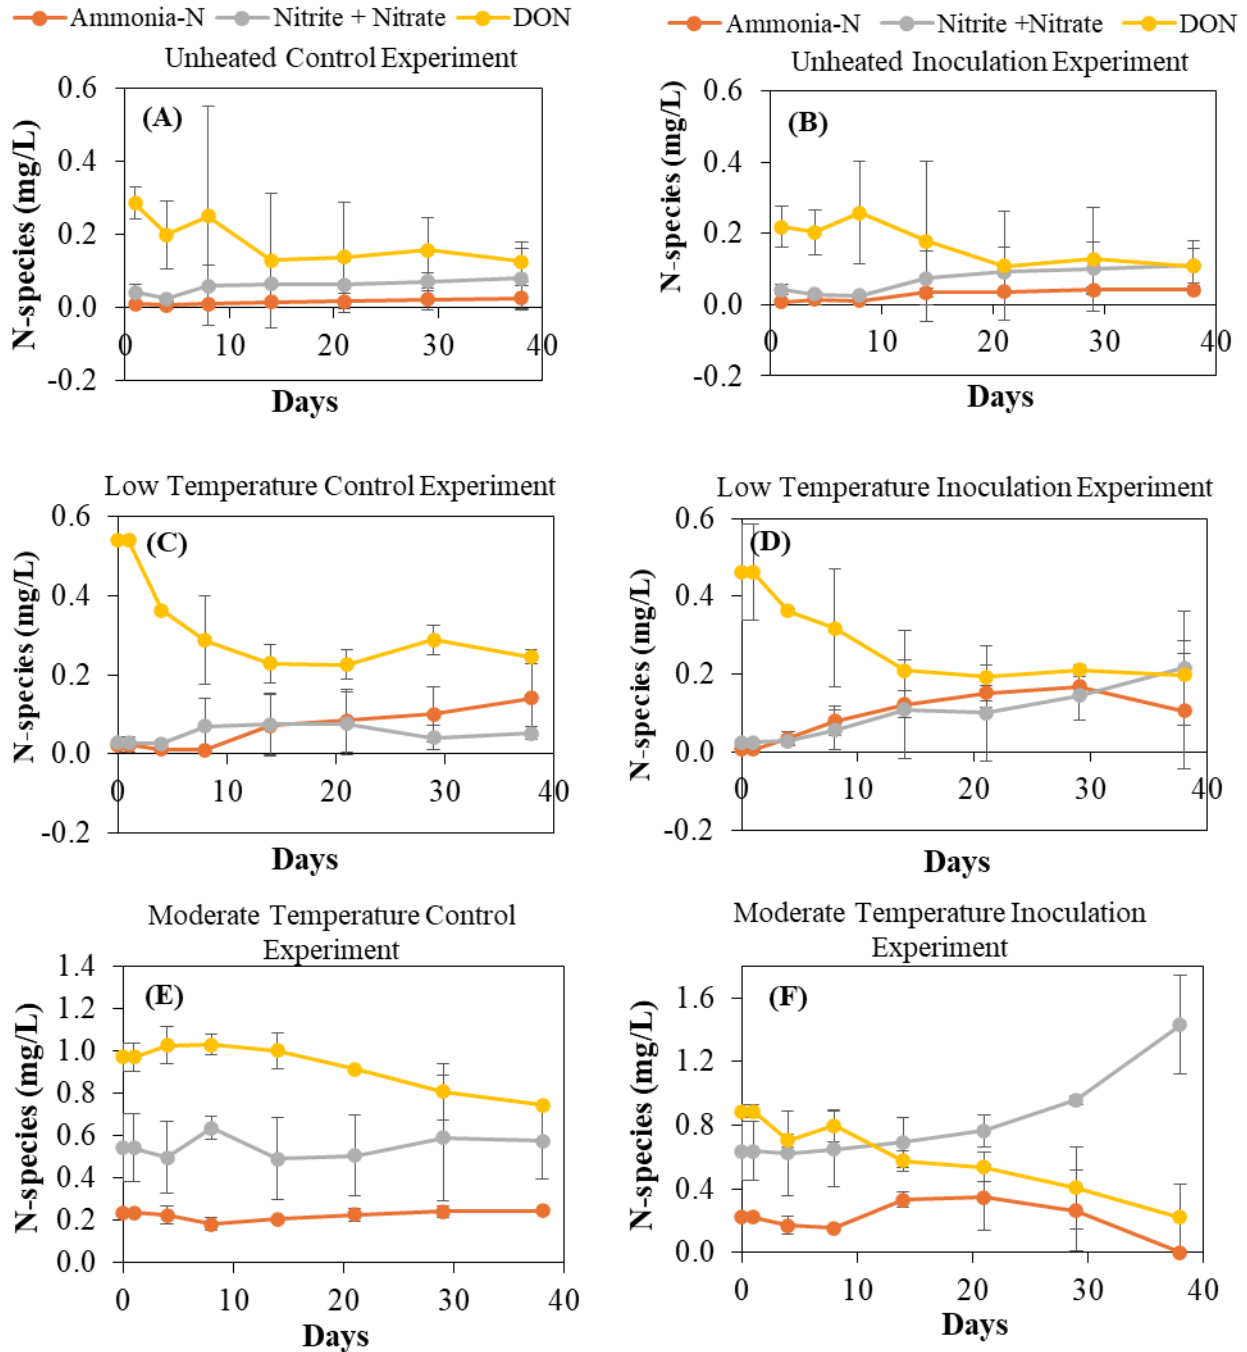

**Figure S3.** Changes in the concentration of nitrogen species- DON, Ammonia-N and nitrite +nitrate for samples of (A) Unheated Control; (B) Unheated Inoculation; (C) Low Temperature Control; (D) Low Temperature Inoculation; (E) Moderate Temperature Control and (F) Moderate Temperature Inoculation experiments.

## 38 References

- 39 1 B. E. Rittmann and P. L. McCarty, *Environmental Biotechnology: Principles and Applications*,  
40 McGraw-Hill Education, New York, Chicago, San Francisco, Athens, London, Madrid, Mexico  
41 City, Milan, New Delhi, Singapore, Sydney, Toronto, 2020.
- 42 2 M. T. Madigan, J. M. Martinko, D. A. Stahl and D. P. Clark, *Brock Biology of Microorganisms*,  
43 Benjamin-Cummings Publishing Company, San Francisco, CA, 2010.
- 44 3 G. M. Masters and W. P. Ela, *Introduction to Environmental Engineering and Science*, Pearson  
45 Education Limited, Harlow, Essex, 2015.
- 46
